# Supplementary material for: Preoperative systemic immune-inflammation index predicts survival and recurrence in patients with resected primary pulmonary sarcomatoid carcinoma
Source: PubMed Central journal article supplement — Transl Lung Cancer Res. 2021 Jan;10(1):18–31. doi: 10.21037/tlcr-20-960 (PMC7867747; doi:10.21037/tlcr-20-960), 2021-01
Supplement: tlcr-10-01-18-dss.pdf [file tlcr-10-01-18-dss.pdf]

## Data Sharing Statement

|                     |                                                                                                                                                     |                                                                                                                              |
|---------------------|-----------------------------------------------------------------------------------------------------------------------------------------------------|------------------------------------------------------------------------------------------------------------------------------|
| <b>Article Info</b> | http://dx.doi.org/10.21037/tlcr-20-960                                                                                                              |                                                                                                                              |
| <b>Item</b>         | <b>Question</b>                                                                                                                                     | <b>Authors' Response<br/>(place "-" if not applicable)</b>                                                                   |
| 1                   | Would you like to share data collected for your study to others?                                                                                    | Yes                                                                                                                          |
| 2                   | If not, would you like to share the reason for your decision?                                                                                       | -                                                                                                                            |
| 3                   | What data in particular will be shared?                                                                                                             | The datasets used and/or analyzed during the current study is available from the corresponding author on reasonable request. |
| 4                   | Any other documents will be shared? Such as study protocol, statistical analysis plan, informed consent form, clinical study report, analytic code. | Statistical analysis plan, informed consent form, and clinical study report will also be shared if requested.                |
| 5                   | When will data availability begin?                                                                                                                  | From the publication date.                                                                                                   |
| 6                   | When will data availability end?                                                                                                                    | Two years within the publication date, since the technique or survival date may be updated over time.                        |
| 7                   | To whom will you share the data?                                                                                                                    | Medical oncologists and thoracic surgeons who are interested in studies of primary pulmonary sarcomatoid carcinoma.          |
| 8                   | For what type of analysis or purpose?                                                                                                               | Research purpose only.                                                                                                       |
| 9                   | How or where can the data/documents be obtained?                                                                                                    | Emails could be sent to the e-mail address of below to obtain the shared data:<br>zengqp000@163.com.                         |
| 10                  | Any other restrictions?                                                                                                                             | We may balance the potential benefits and risks for each request and then provide the data that could be shared.             |
