# Supplementary material for: Preoperative systemic immune-inflammation index predicts survival and recurrence in patients with resected primary pulmonary sarcomatoid carcinoma
Source: PubMed Central journal article supplement — Transl Lung Cancer Res. 2021 Jan;10(1):18–31. doi: 10.21037/tlcr-20-960 (PMC7867747; doi:10.21037/tlcr-20-960), 2021-01
Supplement: tlcr-10-01-18-supplementary.pdf [file tlcr-10-01-18-supplementary.pdf]

Table S1 Patient Characteristics among Three Treatment Groups

| Variables               | Nonsurgical Group (n=22) | Surgery alone Group (n=89) | Surgery±CT±RT Group (n=142) | P value             |
|-------------------------|--------------------------|----------------------------|-----------------------------|---------------------|
| Sex                     |                          |                            |                             | 0.878               |
| Female                  | 5 (22.7)                 | 16 (18.0)                  | 27 (19.0)                   |                     |
| Male                    | 17 (77.3)                | 73 (82.0)                  | 115 (81.0)                  |                     |
| Age, y                  |                          |                            |                             | 0.076               |
| ≤60                     | 12 (54.5)                | 34 (38.2)                  | 75 (52.8)                   |                     |
| >60                     | 10 (45.5)                | 55 (61.8)                  | 67 (47.2)                   |                     |
| Smoking history         |                          |                            |                             | 0.549               |
| No                      | 8 (36.4)                 | 25 (28.1)                  | 49 (34.5)                   |                     |
| Yes                     | 14 (63.6)                | 64 (71.9)                  | 93 (65.5)                   |                     |
| Brinkman index          |                          |                            |                             | 0.560               |
| ≤500                    | 12 (54.5)                | 42 (47.2)                  | 77 (54.2)                   |                     |
| >500                    | 10 (45.5)                | 47 (52.8)                  | 65 (45.8)                   |                     |
| Personal cancer history |                          |                            |                             | 0.601               |
| Yes                     | 20 (90.9)                | 85 (95.5)                  | 136 (95.8)                  |                     |
| No                      | 2 (9.1)                  | 4 (4.5)                    | 6 (4.2)                     |                     |
| Year of diagnosis       |                          |                            |                             | 0.305               |
| 2003-2010               | 4 (18.2)                 | 21 (23.6)                  | 22 (15.5)                   |                     |
| 2011-2018               | 18 (81.8)                | 68 (76.4)                  | 120 (84.5)                  |                     |
| Obstructive pneumonia   |                          |                            |                             | 0.183               |
| No                      | 15 (68.2)                | 63 (70.8)                  | 84 (59.2)                   |                     |
| Yes                     | 7 (31.8)                 | 26 (29.2)                  | 58 (40.8)                   |                     |
| Laterality              |                          |                            |                             | 0.635               |
| Left lung               | 8 (36.4)                 | 40 (44.9)                  | 56 (39.4)                   |                     |
| Right lung              | 14 (63.6)                | 49 (55.1)                  | 86 (60.6)                   |                     |
| Tumor site              |                          |                            |                             | 0.036 <sup>a</sup>  |
| Upper lobe              | 20 (90.9)                | 69 (77.5)                  | 90 (63.4)                   |                     |
| Middle lobe             | 0                        | 4 (4.5)                    | 7 (4.9)                     |                     |
| Lower lobe              | 2 (9.1)                  | 16 (18)                    | 45 (31.7)                   |                     |
| Tumor location          |                          |                            |                             | 0.322               |
| Central                 | 4 (18.2)                 | 25 (28.1)                  | 47 (33.1)                   |                     |
| Peripheral              | 18 (81.8)                | 64 (71.9)                  | 95 (66.9)                   |                     |
| Tumor size, cm          |                          |                            |                             | 0.096               |
| ≤5                      | 9 (40.9)                 | 58 (65.2)                  | 80 (56.3)                   |                     |
| >5                      | 13 (59.1)                | 31 (34.8)                  | 62 (43.7)                   |                     |
| Histology               |                          |                            |                             | 0.002 <sup>a</sup>  |
| Pleomorphic carcinoma   | 1 (4.5)                  | 32 (36)                    | 42 (29.6)                   |                     |
| Spindle cell carcinoma  | 0                        | 18 (20.2)                  | 25 (17.6)                   |                     |
| Giant cell carcinoma    | 0                        | 2 (2.2)                    | 5 (3.5)                     |                     |
| Carcinosarcoma          | 0                        | 0                          | 3 (2.1)                     |                     |
| Pulmonary blastoma      | 0                        | 0                          | 1 (0.7)                     |                     |
| PSC, NOS                | 21 (95.5)                | 37 (41.6)                  | 66 (46.5)                   |                     |
| TNM stage               |                          |                            |                             | <0.001              |
| I                       | 1 (4.5)                  | 27 (30.3)                  | 23 (16.2)                   |                     |
| II                      | 1 (4.5)                  | 24 (27.0)                  | 43 (30.3)                   |                     |
| III                     | 9 (40.9)                 | 37 (41.6)                  | 71 (50.0)                   |                     |
| IV                      | 11 (50.0)                | 1 (1.1)                    | 5 (3.5)                     |                     |
| T category              |                          |                            |                             | 0.037               |
| 1                       | 2 (9.1)                  | 8 (9.0)                    | 8 (5.6)                     |                     |
| 2                       | 5 (22.7)                 | 37 (41.6)                  | 66 (46.5)                   |                     |
| 3                       | 4 (18.2)                 | 26 (29.2)                  | 42 (29.6)                   |                     |
| 4                       | 11 (50.0)                | 18 (20.2)                  | 26 (18.3)                   |                     |
| N category              |                          |                            |                             | <0.001 <sup>a</sup> |
| 0                       | 3 (13.6)                 | 61 (68.5)                  | 63 (44.4)                   |                     |
| 1                       | 3 (13.6)                 | 14 (15.7)                  | 28 (19.7)                   |                     |
| 2                       | 8 (36.4)                 | 14 (15.7)                  | 51 (35.9)                   |                     |
| 3                       | 8 (36.4)                 | 0                          | 0                           |                     |
| M category              |                          |                            |                             | <0.001              |
| 0                       | 11 (50.0)                | 88 (98.9)                  | 137 (96.5)                  |                     |
| 1                       | 11 (50.0)                | 1 (1.1)                    | 5 (3.5)                     |                     |

Abbreviations: CT, chemotherapy; RT, radiotherapy, NOS, not otherwise specified. <sup>a</sup> Date was compared using the Fisher's exact test.

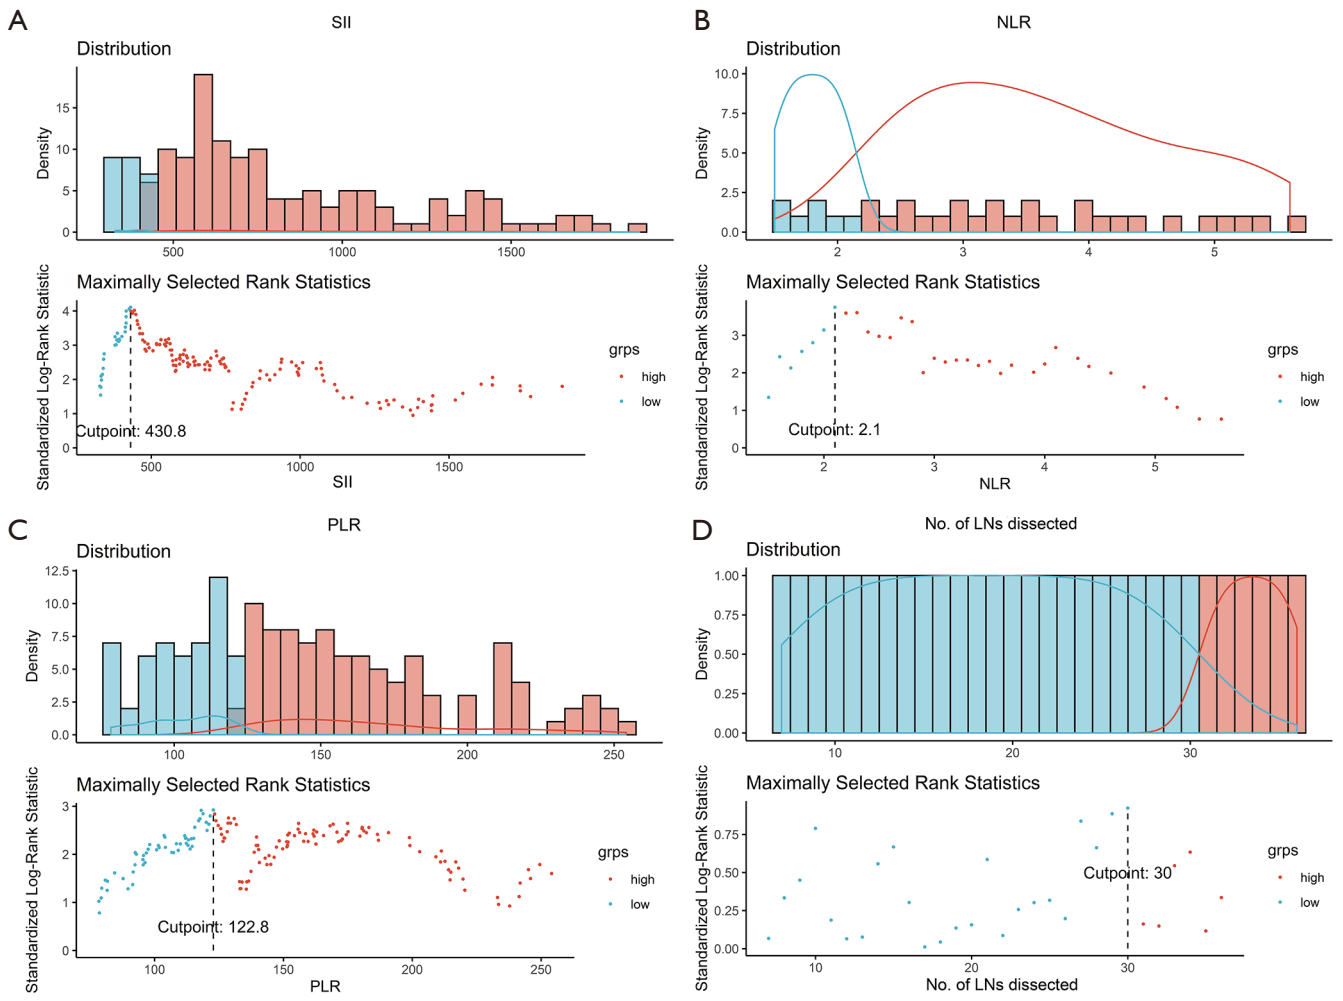

**Figure S1** The optimal cut-off values for SII (A), the NLR (B), the PLR (C), and the number of lymph nodes dissected (D) were determined by R software. SII, systemic inflammation-immune index; NLR, neutrophil-to-lymphocyte ratio; PLR, platelet-lymphocyte ratio.

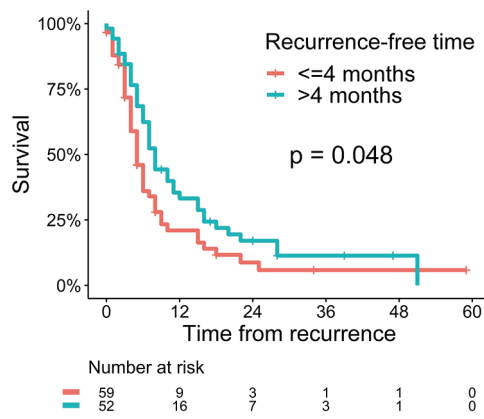

**Figure S2** Comparison of survival after recurrence in patients stratified by recurrence-free time.

**Table S2** Univariate Competing Risk Analysis of Variables Associated with Recurrence in 215 Radically Resected PSC Patients

| Variables                                           | HR (95% CI)         | P value |
|-----------------------------------------------------|---------------------|---------|
| Sex (Male vs. Female)                               | 0.875 (0.584-1.310) | 0.520   |
| Age (>60 vs. ≤60)                                   | 0.896 (0.623-1.290) | 0.550   |
| Smoking history (Yes vs. No)                        | 0.733 (0.506-1.060) | 0.100   |
| Brinkman index (>500 vs. ≤500)                      | 0.685 (0.472-0.996) | 0.047   |
| SII (>430.8 vs. ≤430.8)                             | 2.420 (1.430-4.080) | <0.001  |
| NLR (>2.1 vs. ≤2.1)                                 | 1.620 (1.070-2.450) | 0.023   |
| PLR (>122.8 vs. ≤122.8)                             | 1.660 (1.110-2.470) | 0.013   |
| Personal cancer history (Yes vs. No)                | 0.735 (0.295-1.830) | 0.510   |
| Year of diagnosis (2003-2010 vs. 2011-2018)         | 1.190 (0.755-1.860) | 0.460   |
| Obstructive pneumonia (Yes vs. No)                  | 0.871 (0.590-1.290) | 0.490   |
| Laterality (Right vs. Left)                         | 1.030 (0.711-1.480) | 0.890   |
| Tumor site                                          |                     |         |
| (Middle vs. Upper)                                  | 0.631 (0.267-1.490) | 0.290   |
| (Lower vs. Upper)                                   | 1.103 (0.730-1.670) | 0.640   |
| Tumor location (Peripheral vs. Central)             | 1.020 (0.692-1.490) | 0.940   |
| Tumor size (>5 vs. ≤5)                              | 1.750 (1.220-2.510) | 0.002   |
| Histology                                           |                     |         |
| Pleomorphic carcinoma                               | Reference           |         |
| Spindle cell carcinoma                              | 1.580 (0.945-2.640) | 0.081   |
| Giant cell carcinoma                                | 1.853 (0.893-3.840) | 0.098   |
| Carcinosarcoma                                      | 0.745 (0.130-4.260) | 0.740   |
| Pulmonary blastoma                                  | 3.503 (2.404-5.110) | 0.000   |
| PSC, NOS                                            | 1.467 (0.935-2.300) | 0.095   |
| Resection type                                      |                     |         |
| (Pneumectomy vs. Lobectomy)                         | 0.669 (0.352-1.270) | 0.220   |
| (Sublobectomy vs. Lobectomy)                        | 0.688 (0.291-1.630) | 0.390   |
| No. of lymph nodes dissected (>30 vs. ≤30)          | 1.210 (0.788-1.860) | 0.380   |
| TNM stage                                           |                     |         |
| (II vs. I)                                          | 2.020 (1.180-3.460) | 0.011   |
| (III vs. I)                                         | 2.020 (1.190-3.430) | 0.009   |
| Necrosis (yes vs. no)                               | 1.450 (1.010-2.090) | 0.044   |
| VPI (Yes vs. No)                                    | 1.180 (0.805-1.720) | 0.400   |
| LVI (Yes vs. No)                                    | 0.757 (0.399-1.440) | 0.400   |
| Treatment pattern (Surgery±CT±RT vs. Surgery alone) | 1.630 (1.080-2.470) | 0.021   |

Abbreviations: PSC, pulmonary sarcomatoid carcinoma; HR, hazards ratio; CI, confidence interval; SII, systemic inflammation-immune index; NLR, neutrophil-to-lymphocyte ratio; PLR, platelet-lymphocyte ratio; NOS, not otherwise specified; VPI, visceral pleura invasion; LVI, lymphovascular invasion; CT, chemotherapy; RT, radiotherapy.

**Table S3** Associations between SII and clinicopathological variables

| Variables                    | Total      | SII $\leq$ 430.8 $\times$ 10 <sup>9</sup> | SII $>$ 430.8 $\times$ 10 <sup>9</sup> | P value            |
|------------------------------|------------|-------------------------------------------|----------------------------------------|--------------------|
| No. of patients              | 215        | 46                                        | 169                                    |                    |
| Sex                          |            |                                           |                                        | 0.051              |
| Female                       | 40 (18.6)  | 4 (8.7)                                   | 36 (21.3)                              |                    |
| Male                         | 175 (81.4) | 42 (91.3)                                 | 133 (78.7)                             |                    |
| Age, y                       |            |                                           |                                        | 0.607              |
| $\leq$ 60                    | 96 (44.7)  | 19 (41.3)                                 | 77 (45.6)                              |                    |
| $>$ 60                       | 119 (55.3) | 27 (58.7)                                 | 92 (54.4)                              |                    |
| Smoking history              |            |                                           |                                        | 0.362              |
| No                           | 68 (31.6)  | 12 (26.1)                                 | 56 (33.1)                              |                    |
| Yes                          | 147 (68.4) | 34 (73.9)                                 | 113 (66.9)                             |                    |
| Brinkman index               |            |                                           |                                        | 0.561              |
| $\leq$ 500                   | 111 (51.6) | 22 (47.8)                                 | 89 (52.7)                              |                    |
| $>$ 500                      | 104 (48.4) | 24 (52.2)                                 | 80 (47.3)                              |                    |
| Personal cancer history      |            |                                           |                                        | 0.497              |
| No                           | 205 (95.3) | 43 (93.5)                                 | 162 (95.9)                             |                    |
| Yes                          | 10 (4.7)   | 3 (6.5)                                   | 7 (4.1)                                |                    |
| Year of diagnosis            |            |                                           |                                        | 0.297              |
| 2003-2010                    | 40 (18.6)  | 11 (23.9)                                 | 29 (17.2)                              |                    |
| 2011-2018                    | 175 (81.4) | 35 (76.1)                                 | 140 (82.8)                             |                    |
| Obstructive pneumonia        |            |                                           |                                        | 0.137              |
| No                           | 134 (62.3) | 33 (71.7)                                 | 101 (59.8)                             |                    |
| Yes                          | 81 (37.7)  | 13 (28.3)                                 | 68 (40.2)                              |                    |
| Laterality                   |            |                                           |                                        | 0.181              |
| Left lung                    | 89 (41.4)  | 23 (50)                                   | 66 (39.1)                              |                    |
| Right lung                   | 126 (58.6) | 23 (50)                                   | 103 (60.9)                             |                    |
| Tumor site                   |            |                                           |                                        | 0.565              |
| Upper lobe                   | 148 (68.8) | 34 (73.9)                                 | 114 (67.5)                             |                    |
| Middle lobe                  | 10 (4.7)   | 1 (2.2)                                   | 9 (5.3)                                |                    |
| Lower lobe                   | 57 (26.5)  | 11 (23.9)                                 | 46 (27.2)                              |                    |
| Tumor location               |            |                                           |                                        | 0.786              |
| Central                      | 69 (32.1)  | 14 (30.4)                                 | 55 (32.5)                              |                    |
| Peripheral                   | 146 (67.9) | 32 (69.6)                                 | 114 (67.5)                             |                    |
| Tumor size, cm               |            |                                           |                                        | 0.010              |
| $\leq$ 5                     | 128 (59.5) | 35 (76.1)                                 | 93 (55)                                |                    |
| $>$ 5                        | 87 (40.5)  | 11 (23.9)                                 | 76 (45)                                |                    |
| Histology                    |            |                                           |                                        | 0.008 <sup>a</sup> |
| Pleomorphic carcinoma        | 69 (32.1)  | 15 (32.6)                                 | 54 (32)                                |                    |
| Spindle cell carcinoma       | 41 (19.1)  | 15 (32.6)                                 | 26 (15.4)                              |                    |
| Giant cell carcinoma         | 7 (3.3)    | 2 (4.3)                                   | 5 (3)                                  |                    |
| Carcinosarcoma               | 3 (1.4)    | 2 (4.3)                                   | 1 (0.6)                                |                    |
| Pulmonary blastoma           | 1 (0.5)    | 0 (0)                                     | 1 (0.6)                                |                    |
| PSC, NOS                     | 94 (43.7)  | 12 (26.1)                                 | 82 (48.5)                              |                    |
| Resection type               |            |                                           |                                        | 0.719              |
| Lobectomy                    | 182 (84.7) | 39 (84.8)                                 | 143 (84.6)                             |                    |
| Pneumectomy                  | 23 (10.7)  | 4 (8.7)                                   | 19 (11.2)                              |                    |
| Sublobectomy                 | 10 (4.7)   | 3 (6.5)                                   | 7 (4.1)                                |                    |
| No. of lymph nodes dissected |            |                                           |                                        | 0.455              |
| $\leq$ 30                    | 164 (76.3) | 37 (80.4)                                 | 127 (75.1)                             |                    |
| $>$ 30                       | 51 (23.7)  | 9 (19.6)                                  | 42 (24.9)                              |                    |
| TNM stage                    |            |                                           |                                        | 0.001              |
| I                            | 49 (22.8)  | 20 (43.5)                                 | 29 (17.2)                              |                    |
| II                           | 65 (30.2)  | 12 (26.1)                                 | 53 (31.4)                              |                    |
| III                          | 101 (47.0) | 14 (30.4)                                 | 87 (51.5)                              |                    |
| Necrosis                     |            |                                           |                                        | 0.801              |
| No                           | 118 (54.9) | 26 (56.5)                                 | 92 (54.4)                              |                    |
| Yes                          | 97 (45.1)  | 20 (43.5)                                 | 77 (45.6)                              |                    |
| VPI                          |            |                                           |                                        | 0.692              |
| No                           | 88 (40.9)  | 20 (43.5)                                 | 68 (40.2)                              |                    |
| Yes                          | 127 (59.1) | 26 (56.5)                                 | 101 (59.8)                             |                    |
| LVI                          |            |                                           |                                        | 0.549              |
| No                           | 191 (88.8) | 42 (91.3)                                 | 149 (88.2)                             |                    |
| Yes                          | 24 (11.2)  | 4 (8.7)                                   | 20 (11.8)                              |                    |
| Treatment pattern            |            |                                           |                                        | 0.360              |
| Surgery alone                | 81 (37.7)  | 26 (56.5)                                 | 108 (63.9)                             |                    |
| Surgery $\pm$ CT $\pm$ RT    | 134 (62.3) | 20 (43.5)                                 | 61 (36.1)                              |                    |
| Recurrence                   |            |                                           |                                        | 0.001              |
| No                           | 104 (48.4) | 32 (69.6)                                 | 72 (42.6)                              |                    |
| Yes                          | 111 (51.6) | 14 (30.4)                                 | 97 (57.4)                              |                    |

Abbreviations: SII, systemic inflammation-immune index; NOS, not otherwise specified; VPI, visceral pleura invasion; LVI, lymphovascular invasion; CT, chemotherapy; RT, radiotherapy. <sup>a</sup> Date was compared using the Fisher's exact test.
